# Supplementary material
Source: publisher figshare collection journal article supplement (https://acs.figshare.com/ndownloader/files/6413136)
Supplement: Supplementary file 1 [file 6413136]

# Electronic Supporting Information

## Modification of Hematite Photoanode with Cobalt Based Oxygen Evolution Catalyst via Bifunctional Linker Approach for Efficient Water Splitting

*Amira Y. Ahmed, Mahmoud G. Ahmed, and Tarek A. Kandiel\**

Department of Chemistry, Faculty of Science, Sohag University, Sohag 82524, Egypt

Email: [kandiel@science.sohag.edu.eg](mailto:kandiel@science.sohag.edu.eg)

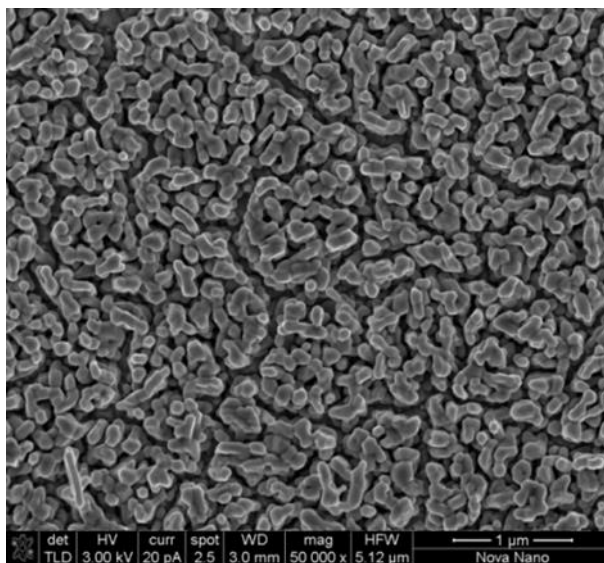

**Figure S1.** SEM image of hematite film.

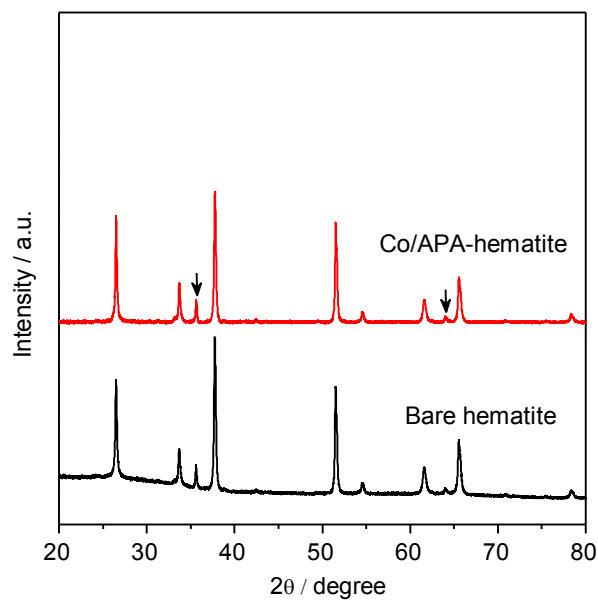

**Figure S2.** XRD diffraction patterns of bare- and Co/APA-hematite photoanodes. The arrow symbol indicates Bragg positions located at  $35.7^\circ$  and  $64.05^\circ$  ( $2\theta$ ) for (110) and (300) diffraction peaks of hematite, respectively, according to the JCPDS card no. 033-0664. The other peaks indicate Bragg positions for FTO layer on the glass substrate according to the JCPDS card no. 041-1445.

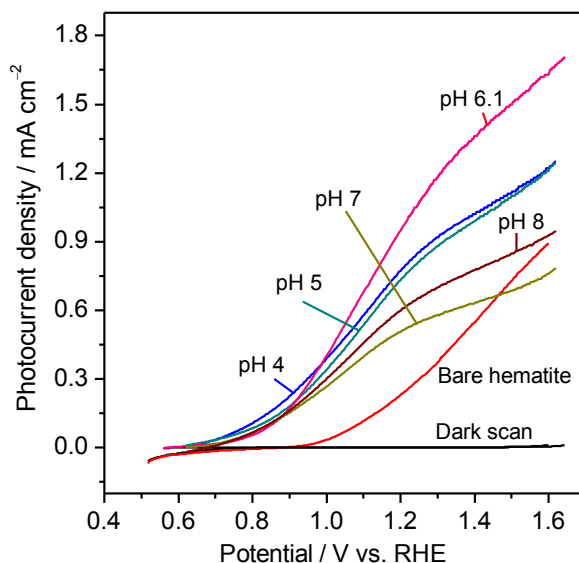

**Figure S3.** I–V curves for photoelectrochemical water oxidation on bare- and Co/APA-hematite photoanodes measured under simulated solar light (1 sun, AM 1.5G) from 1.0 mol L<sup>-1</sup> NaOH solution. Modification conditions: hematite films were immersed in 10 mmol L<sup>-1</sup> APA aqueous solutions for 120 min at different pH values followed by soaking in 5 mmol L<sup>-1</sup> cobalt nitrate aqueous solution for 60 min.

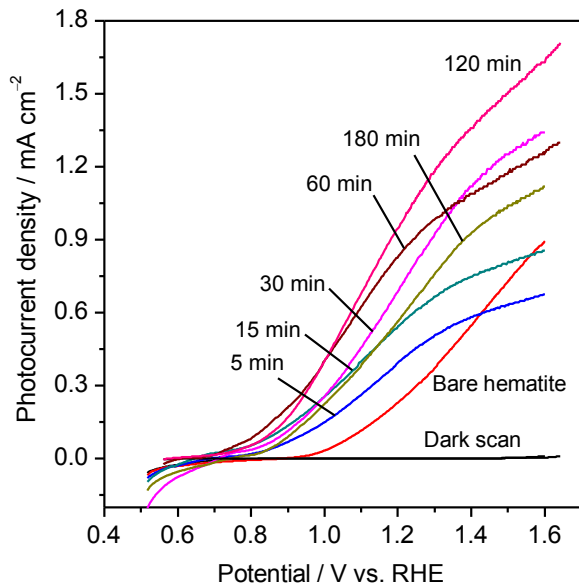

**Figure S4.** I–V curves for photoelectrochemical water oxidation on bare- and Co/APA-hematite photoanodes measured under simulated solar light (1 sun, AM 1.5G) from 1.0 mol L<sup>-1</sup> NaOH solution. Modification conditions: hematite films were immersed in 10 mmol L<sup>-1</sup> APA aqueous solutions for different time (5 – 180 min) at pH 6.1 followed by soaking in 5 mmol L<sup>-1</sup> cobalt nitrate aqueous solution for 60 min.

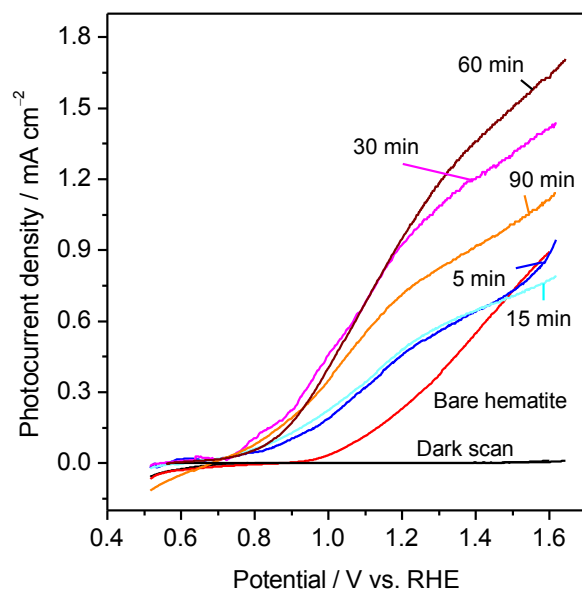

**Figure S5.** I–V curves for photoelectrochemical water oxidation on bare- and Co/APA-hematite photoanodes measured under simulated solar light (1 sun, AM 1.5G) from 1.0 mol L<sup>-1</sup> NaOH solution. Modification conditions: hematite films were immersed in 10 mmol L<sup>-1</sup> APA aqueous solutions for 120 min at pH 6.1 followed by soaking in 5 mmol L<sup>-1</sup> cobalt nitrate aqueous solution for different time periods (5 – 90 min).

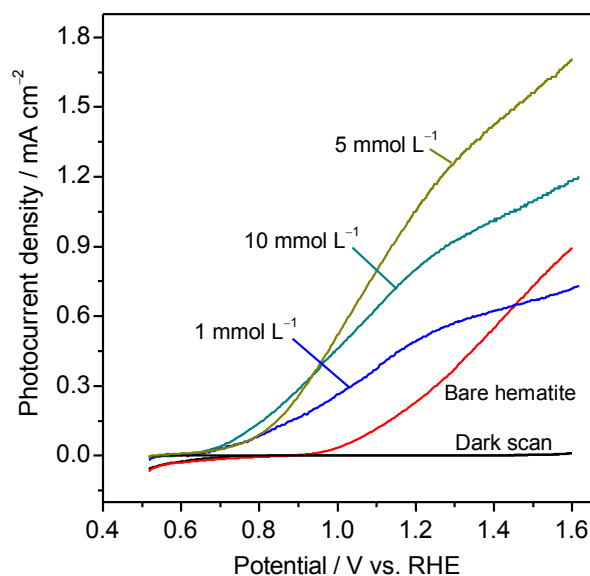

**Figure S6.** I–V curves for photoelectrochemical water oxidation on bare- and Co/APA-hematite photoanodes measured under simulated solar light (1 sun, AM 1.5G) from 1.0 mol L<sup>-1</sup> NaOH solution. Modification conditions: hematite films were immersed in 10 mmol L<sup>-1</sup> APA aqueous solutions for 120 min at pH 6.1 followed by soaking in different concentrations of cobalt nitrate aqueous solution for 60 min.

End of Electronic Supporting Information
